# Supplementary material for: Checkpoint kinase 1/2 inhibition potentiates anti-tumoral immune response and sensitizes gliomas to immune checkpoint blockade
Source: PubMed Central journal article supplement (PMC10033639; doi:10.1038/s41467-023-36878-2), 2023-03-22
Supplement: 41467_2023_36878_MOESM3_ESM.pdf [file 41467_2023_36878_MOESM3_ESM.pdf]

## **Description of Additional Supplementary Files**

**Supplementary Data 1:** List of gene sets.

The list contains gene ontology term enriched gene sets for the data presented on figures 3d-e, 4b, supplementary figures 3b-d, 5b-c, 6b-c.
